# Supplementary material for: Coping with Workplace Incivility in Hospital Teams: How Does Team Mindfulness Influence Prevention- and Promotion-Focused Emotional Coping?
Source: MDPI journal article supplement (doi:10.3390/ijerph192316209), 2022-12-03
Supplement: s1 [file s1]

| Level and variable                                              | Model   |                              |                               |                                     |                                |                            |
|-----------------------------------------------------------------|---------|------------------------------|-------------------------------|-------------------------------------|--------------------------------|----------------------------|
|                                                                 | 1. Null | 2. Fixed effects of controls | 3. Fixed effect of incivility | 4. Fixed effect of team mindfulness | 5. Random effect of incivility | 6. Cross-level interaction |
| <b>Level 1</b>                                                  |         |                              |                               |                                     |                                |                            |
| Age                                                             |         | .02 (.01)                    | .02 (.01)                     | .02 (.01)                           | .02 (.01)                      | .01 (.01)                  |
| Gender                                                          |         | .42 (.22)                    | .45* (.22)                    | .45* (.21)                          | .43* (.21)                     | .42* (.21)                 |
| Incivility                                                      |         |                              | .20** (.07)                   | .20** (.07)                         |                                |                            |
| <b>Level 2</b>                                                  |         |                              |                               |                                     |                                |                            |
| Team size                                                       |         | .01 (.02)                    | .01 (.02)                     | .01 (.02)                           | .01 (.02)                      | .01 (.02)                  |
| Team mindfulness                                                |         |                              |                               | -.74** (.20)                        | -.72** (.21)                   | -.74** (.20)               |
| <b>Cross-level interaction</b>                                  |         |                              |                               |                                     |                                |                            |
| Incivility Team mindfulness                                     |         |                              |                               |                                     |                                | -.47* (.21)                |
| ICC                                                             | .10     |                              |                               |                                     |                                |                            |
| -2 log likelihood                                               | 1548.11 | 1507.06                      | 1497.85                       | 1485.68                             | 1485.42                        | 1479.68                    |
| Number of estimated parameters                                  | 3       | 6                            | 7                             | 8                                   | 10                             | 11                         |
| Values in parentheses are standard errors; *p < .05. **p < .01. |         |                              |                               |                                     |                                |                            |

**Table S2: Behavioral Disengagement Multilevel Results**

| Level and variable             | Model   |                              |                               |                                     |                                |                            |
|--------------------------------|---------|------------------------------|-------------------------------|-------------------------------------|--------------------------------|----------------------------|
|                                | 1. Null | 2. Fixed effects of controls | 3. Fixed effect of incivility | 4. Fixed effect of team mindfulness | 5. Random effect of incivility | 6. Cross-level interaction |
| <b>Level 1</b>                 |         |                              |                               |                                     |                                |                            |
| Age                            |         | .01 (.01)                    | .01 (.01)                     | .01 (.01)                           | .01 (.01)                      | .01 (.01)                  |
| Gender                         |         | .00 (.21)                    | .04 (.21)                     | .04 (.21)                           | .02 (.21)                      | .02 (.21)                  |
| Incivility                     |         |                              | .27** (.06)                   | .27** (.06)                         |                                |                            |
| <b>Level 2</b>                 |         |                              |                               |                                     |                                |                            |
| Team size                      |         | -.03 (.03)                   | -.03 (.03)                    | -.03 (.02)                          | -.03 (.02)                     | -.03 (.02)                 |
| Team mindfulness               |         |                              |                               | -.53* (.21)                         | -.49* (.21)                    | -.52* (.21)                |
| <b>Cross-level interaction</b> |         |                              |                               |                                     |                                |                            |
| Incivility Team mindfulness    |         |                              |                               |                                     |                                | -.23 (.20)                 |
| ICC                            | .15     |                              |                               |                                     |                                |                            |
| -2 log likelihood              | 1485.76 | 1454.95                      | 1435.43                       | 1429.60                             | 1425.33                        | 1424.05                    |
| Number of estimated parameters | 3       | 6                            | 7                             | 8                                   | 10                             | 11                         |

Values in parentheses are standard errors; \*p < .05. \*\*p < .01.

| Level and variable             | Model   |                              |                               |                                     |                                |                            |
|--------------------------------|---------|------------------------------|-------------------------------|-------------------------------------|--------------------------------|----------------------------|
|                                | 1. Null | 2. Fixed effects of controls | 3. Fixed effect of incivility | 4. Fixed effect of team mindfulness | 5. Random effect of incivility | 6. Cross-level interaction |
| <b>Level 1</b>                 |         |                              |                               |                                     |                                |                            |
| Age                            |         | .01 (.01)                    | .01 (.01)                     | .01 (.01)                           | .01 (.01)                      | .01 (.01)                  |
| Gender                         |         | -.58** (.22)                 | -.55** (.22)                  | -.57** (.22)                        | -.61** (.22)                   | -.61** (.22)               |
| Incivility                     |         |                              | .17** (.06)                   | .17** (.06)                         |                                |                            |
| <b>Level 2</b>                 |         |                              |                               |                                     |                                |                            |
| Team size                      |         | -.02 (.03)                   | -.02 (.03)                    | -.02 (.03)                          | -.02 (.03)                     | -.02 (.03)                 |
| Team mindfulness               |         |                              |                               | -.46* (.22)                         | -.46* (.22)                    | -.46* (.22)                |
| <b>Cross-level interaction</b> |         |                              |                               |                                     |                                |                            |
| Incivility Team mindfulness    |         |                              |                               |                                     |                                | -.25 (.22)                 |
| ICC                            | .19     |                              |                               |                                     |                                |                            |
| -2 log likelihood              | 1516.70 | 1477.19                      | 1470.03                       | 1465.85                             | 1462.10                        | 1460.82                    |
| Number of estimated parameters | 3       | 6                            | 7                             | 8                                   | 10                             | 11                         |

Values in parentheses are standard errors; \*p < .05. \*\*p < .01.

| Level and variable             | Model   |                              |                               |                                     |                                |                            |
|--------------------------------|---------|------------------------------|-------------------------------|-------------------------------------|--------------------------------|----------------------------|
|                                | 1. Null | 2. Fixed effects of controls | 3. Fixed effect of incivility | 4. Fixed effect of team mindfulness | 5. Random effect of incivility | 6. Cross-level interaction |
| <b>Level 1</b>                 |         |                              |                               |                                     |                                |                            |
| Age                            |         | -.01 (.01)                   | -.01 (.01)                    | .01 (.01)                           | .01 (.01)                      | .01 (.01)                  |
| Gender                         |         | -.22 (.16)                   | -.22 (.16)                    | -.21 (.16)                          | -.23 (.16)                     | -.23 (.16)                 |
| Incivility                     |         |                              | .02 (.05)                     | .02 (.05)                           |                                |                            |
| <b>Level 2</b>                 |         |                              |                               |                                     |                                |                            |
| Team size                      |         | .03 (.02)                    | .03 (.02)                     | .04 (.02)                           | .03 (.02)                      | .03 (.02)                  |
| Team mindfulness               |         |                              |                               | -.19 (.15)                          | -.22 (.15)                     | -.20 (.15)                 |
| <b>Cross-level interaction</b> |         |                              |                               |                                     |                                |                            |
| Incivility Team mindfulness    |         |                              |                               |                                     |                                | -.15 (.15)                 |
| ICC                            | .05     |                              |                               |                                     |                                |                            |
| -2 log likelihood              | 1265.63 | 1232.78                      | 1232.62                       | 1230.93                             | 1229.65                        | 1228.64                    |
| Number of estimated parameters | 3       | 6                            | 7                             | 8                                   | 10                             | 11                         |

Values in parentheses are standard errors; \*p < .05. \*\*p < .01.

**Table S5: Positive Reframing Multilevel Results**

| Level and variable             | Model   |                              |                               |                                     |                                |                            |
|--------------------------------|---------|------------------------------|-------------------------------|-------------------------------------|--------------------------------|----------------------------|
|                                | 1. Null | 2. Fixed effects of controls | 3. Fixed effect of incivility | 4. Fixed effect of team mindfulness | 5. Random effect of incivility | 6. Cross-level interaction |
| <b>Level 1</b>                 |         |                              |                               |                                     |                                |                            |
| Age                            |         | .01 (.01)                    | .01 (.01)                     | .01 (.01)                           | .01 (.01)                      | .01 (.01)                  |
| Gender                         |         | -.16 (.15)                   | -.16 (.15)                    | -.16 (.15)                          | -.16 (.15)                     | -.16 (.15)                 |
| Incivility                     |         |                              | -.01 (.04)                    | -.01 (.04)                          |                                |                            |
| <b>Level 2</b>                 |         |                              |                               |                                     |                                |                            |
| Team size                      |         | .03 (.02)                    | .03 (.02)                     | .03 (.02)                           | .03 (.02)                      | .03 (.02)                  |
| Team mindfulness               |         |                              |                               | -.20 (.16)                          | -.21 (.16)                     | -.20 (.16)                 |
| <b>Cross-level interaction</b> |         |                              |                               |                                     |                                |                            |
| Incivility Team mindfulness    |         |                              |                               |                                     |                                | -.04 (.14)                 |
| ICC                            | .17     |                              |                               |                                     |                                |                            |
| -2 log likelihood              | 1181.52 | 1156.38                      | 1156.36                       | 1154.79                             | 1153.82                        | 1153.75                    |
| Number of estimated parameters | 3       | 6                            | 7                             | 8                                   | 10                             | 11                         |

Values in parentheses are standard errors; \*p < .05. \*\*p < .01.
